# Supplementary material for: Valorisation of xylose to lactic acid on morphology-controlled ZnO catalysts
Source: Royal Society of Chemistry journal article supplement (doi:10.1039/c8cy00679b), 2018-01-01
Supplement: c8cy00679b1.pdf [file c8cy00679b1.pdf]

## SUPPLEMENTARY INFORMATION

### Valorisation of xylose to lactic acid on morphology-controlled ZnO catalysts

Priscilla N. Paulino,<sup>a</sup> Orlani C. Reis,<sup>a</sup> Yordy E. Licea,<sup>b</sup> Elise M. Albuquerque<sup>a</sup> and

Marco A. Fraga<sup>a\*</sup>

<sup>a</sup> Instituto Nacional de Tecnologia/MCTIC, Laboratório de Catálise, Av. Venezuela, 82, sala 518, Centro, Rio de Janeiro/RJ, 20081-312, Brazil

<sup>b</sup> Instituto Nacional de Tecnologia/MCTIC, Centro de Caracterização em Nanotecnologia para Materiais e Catálise – CENANO, Av. Venezuela, 82, Anexo 2, Centro, Rio de Janeiro/RJ, 20081-312, Brazil.

e-mail: marco.fraga@int.gov.br

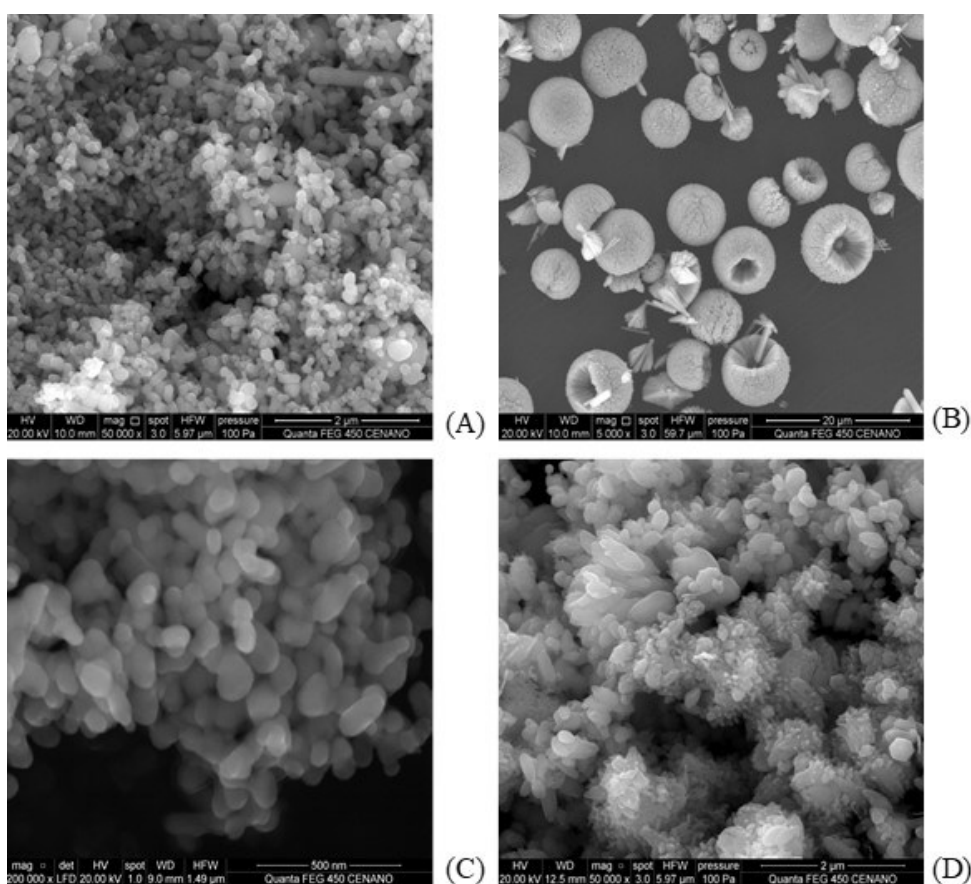

**Fig. S1.** Representative FE-SEM images of (A) ZnO-P, (B) ZnO-D, (C) ZnO-NP and (D) ZnO-R after thermal treatment at 500 °C.

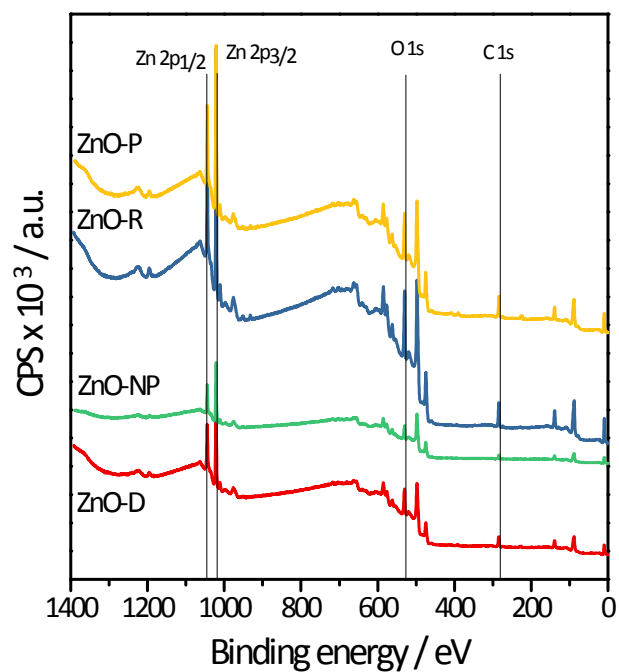

**Fig. S2.** Wide scan surveys XP spectra for all synthesized ZnO catalysts.

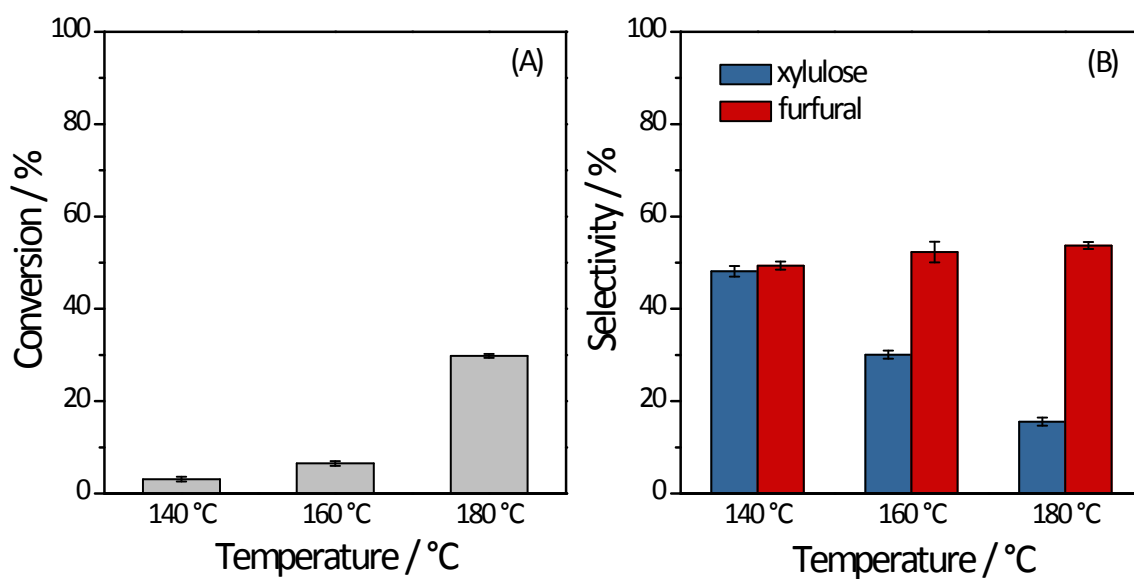

**Fig. S3.** Xylose conversion (A) and selectivity to xylulose and furfural (B) at different reaction temperatures in the absence of any catalyst (homogeneous thermal conversion).

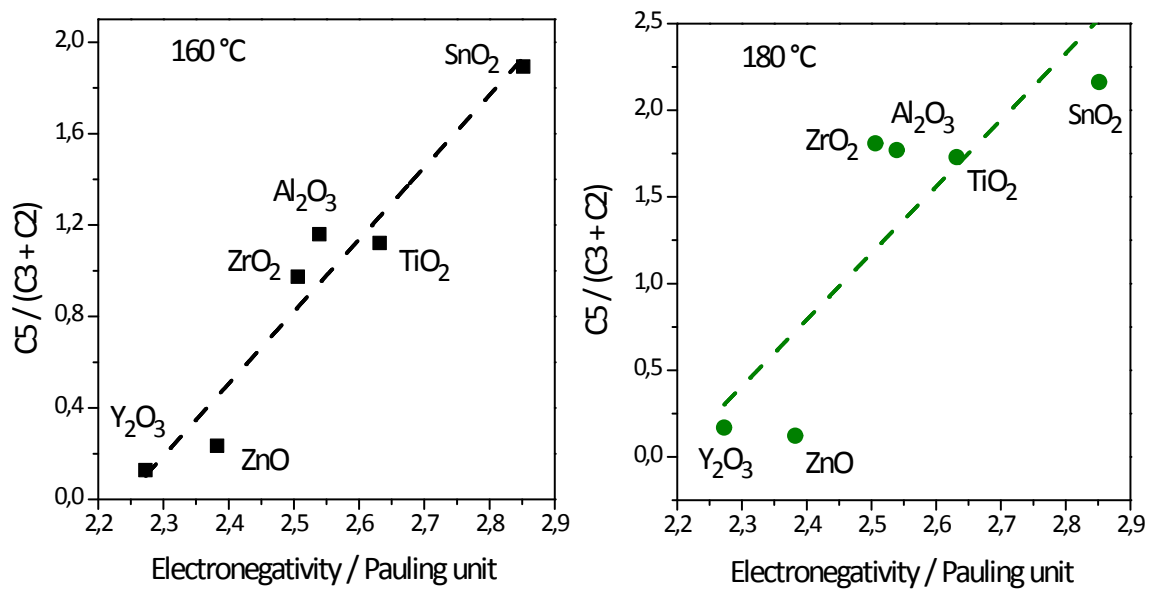

**Fig. S4.** Correlation between C5/C3+C2 products and electronegativity of oxide catalysts at 160 and 180 °C.

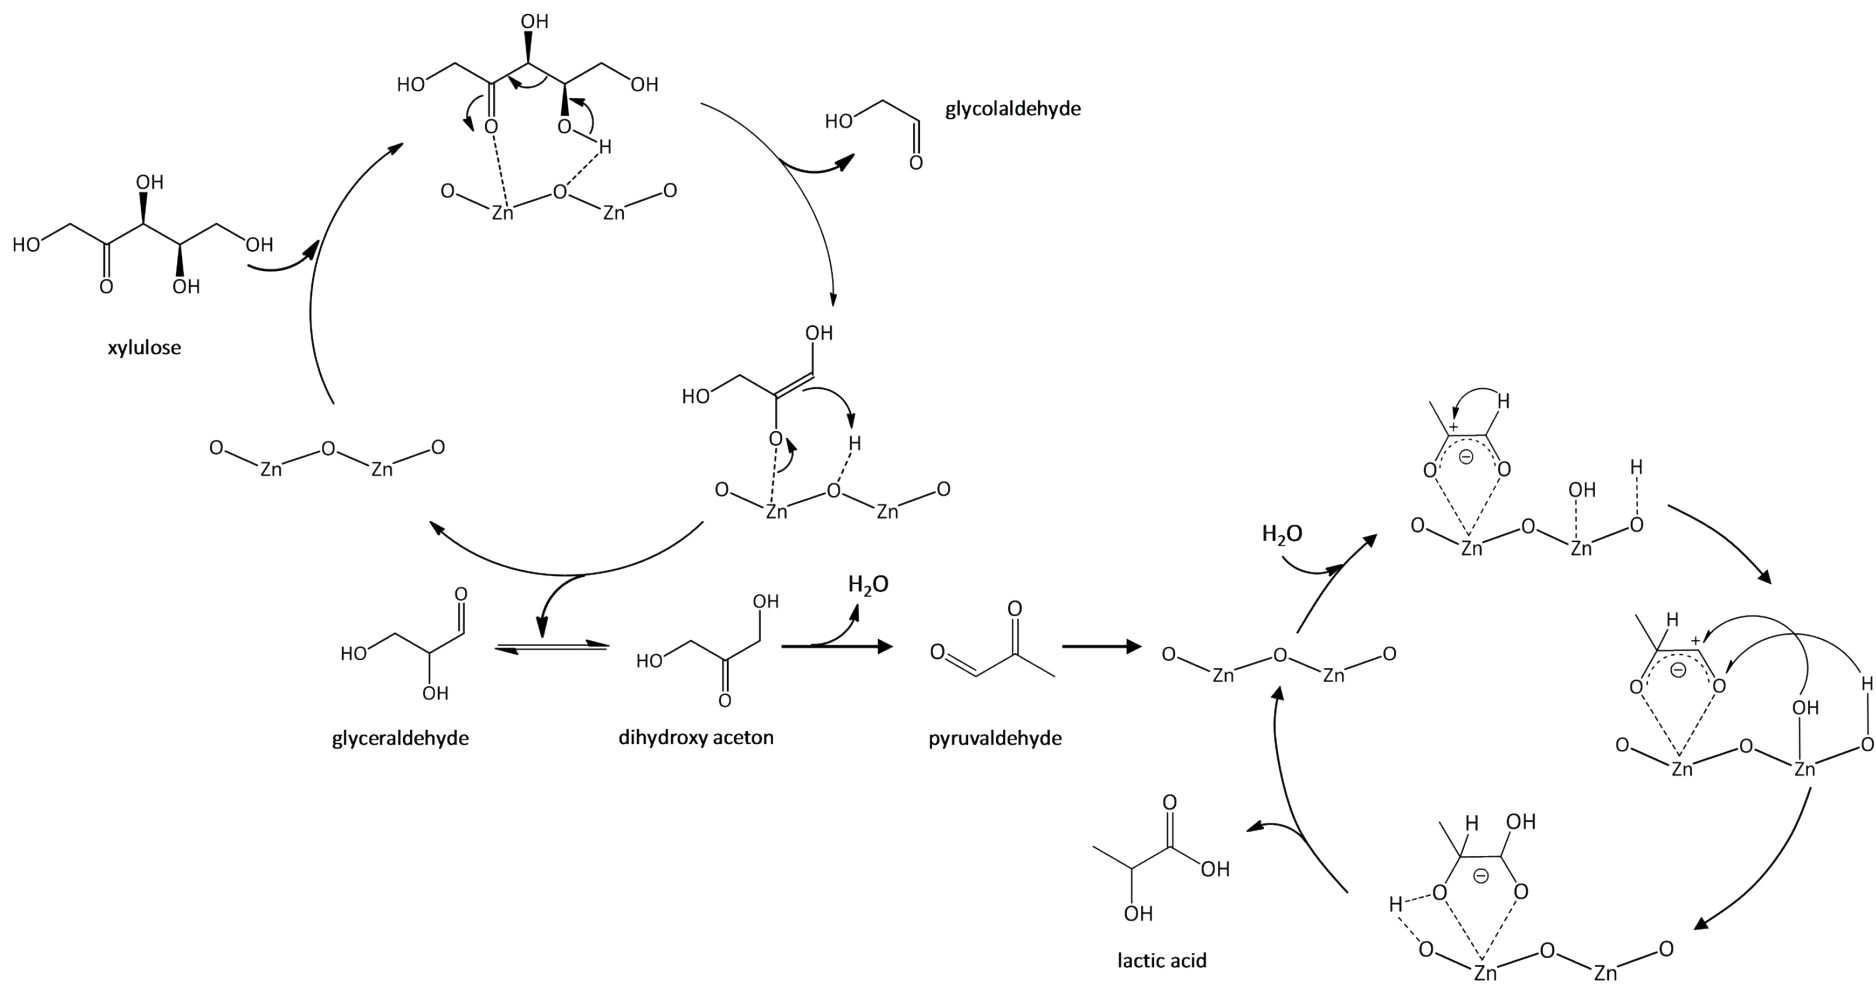

**Fig. S5.** Reaction mechanism taking into consideration the ketopentose isomer (xylulose).

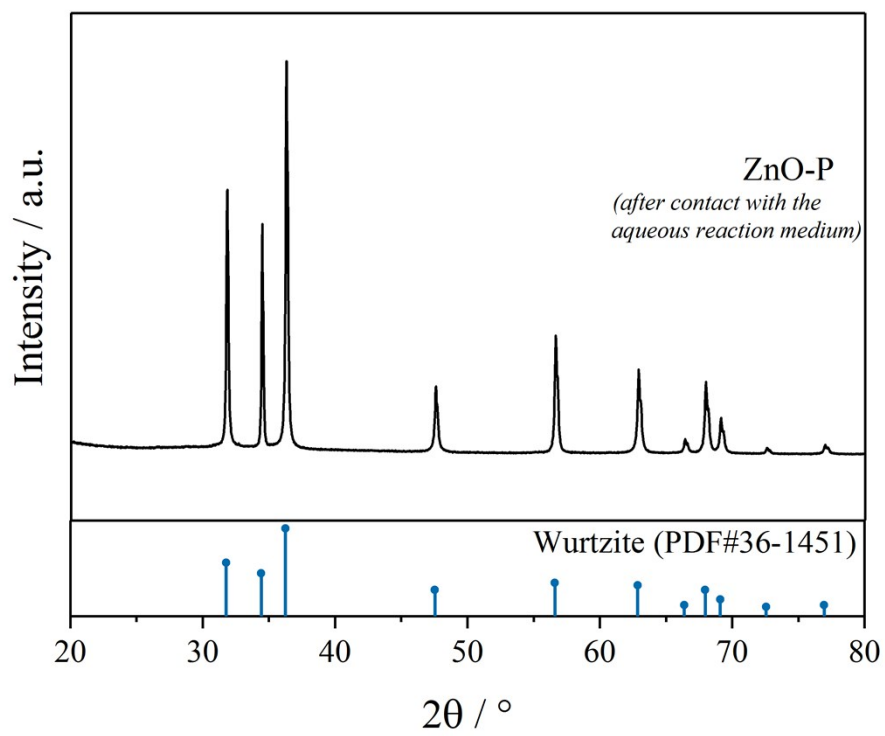

**Fig. S6.** Diffraction pattern of ZnO-P catalyst after contact with the aqueous reaction medium.

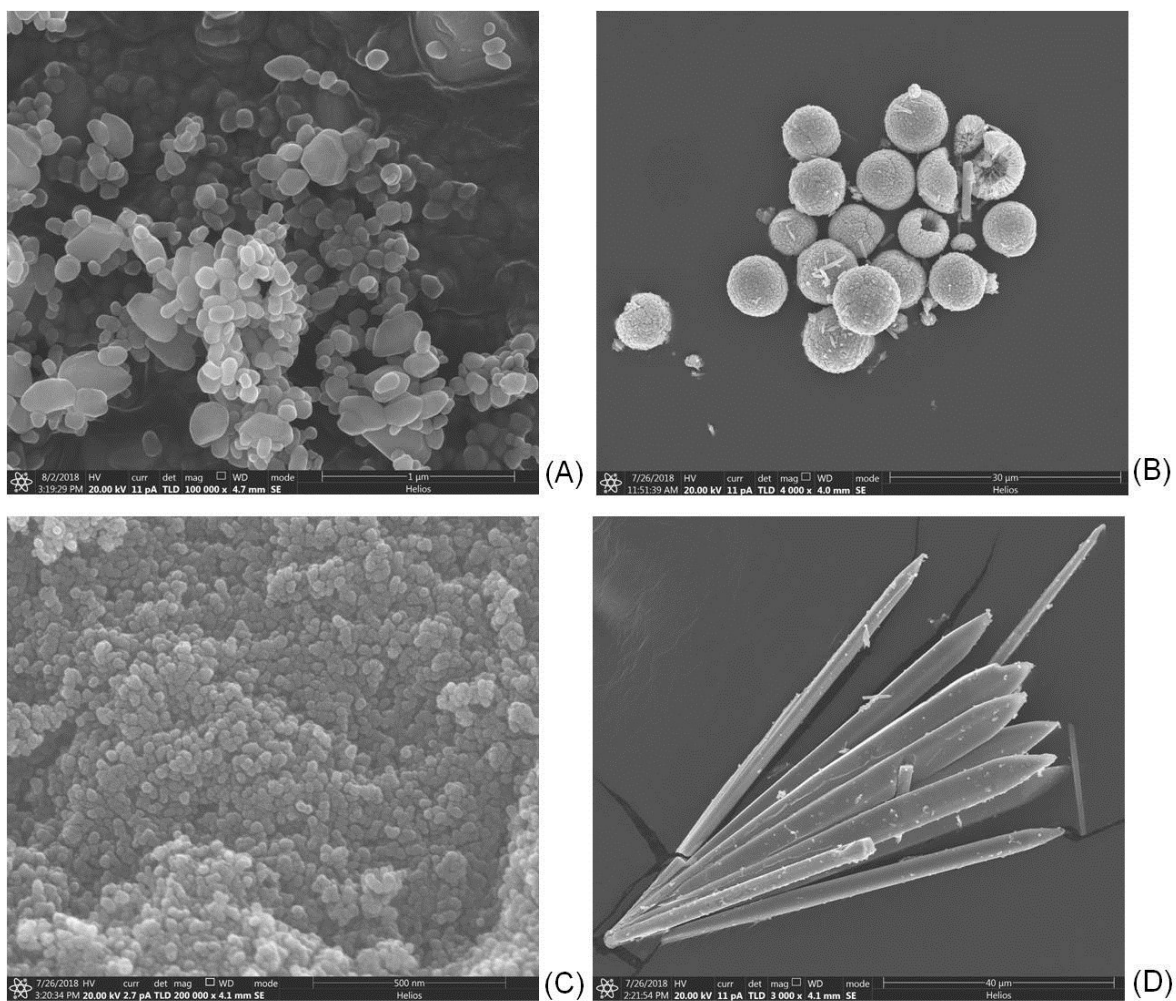

**Fig. S7.** Representative FE-SEM images of (A) ZnO-P, (B) ZnO-D, (C) ZnO-NP and (D) ZnO-R after xylose conversion at 180 °C and regeneration (coke burn-off) at 500 °C.
